# Supplementary material for: Paper Test Cards for Presumptive Testing of Very Low Quality Antimalarial Medications
Source: PubMed Central journal article supplement (PMC4455083; doi:10.4269/ajtmh.14-0384), 2015-06-03
Supplement: SD1.pdf [file SD1.pdf]

SUPPLEMENTAL TABLE 1  
Layout of test reagents for 12-lane PAD

|                            | Lane | Row | Reagent                              | Concentration<br>(in water unless stated otherwise)       |
|----------------------------|------|-----|--------------------------------------|-----------------------------------------------------------|
| Timer                      | Edge | 0   | NiCl <sub>2</sub>                    | 0.2 M                                                     |
|                            |      | 3   | Dimethylglyoxime                     | 0.2 M in acetonitrile                                     |
| Ninhydrin                  | A    | 1   | Ninhydrin                            | 50 mg/mL in acetonitrile                                  |
|                            |      | 2   | Ninhydrin                            | 50 mg/mL in acetonitrile                                  |
|                            |      | 3   | Ninhydrin                            | 50 mg/mL in acetonitrile                                  |
|                            |      | 5   | K <sub>2</sub> CO <sub>3</sub>       | 2 M                                                       |
| Biuret reagent             | B    | 3   | Biuret test reagent*                 | 10×                                                       |
|                            |      | 4   | Biuret test reagent*                 | 10×                                                       |
| Tertiary amines            | C    | 3   | Co(SCN) <sub>2</sub>                 | 1 M Co(SCN) <sub>2</sub>                                  |
|                            |      | 4   | Co(SCN) <sub>2</sub>                 | 1 M Co(SCN) <sub>2</sub>                                  |
|                            |      | 5   | Tosic acid                           | 1 M                                                       |
| Basic Co(SCN) <sub>2</sub> | D    | 6   | Tosic acid                           | 1 M                                                       |
|                            |      | 3   | Co(SCN) <sub>2</sub>                 | 1 M Co(SCN) <sub>2</sub>                                  |
|                            |      | 4   | Co(SCN) <sub>2</sub>                 | 1 M Co(SCN) <sub>2</sub>                                  |
|                            |      | 5   | Tris buffer pH 8.0                   | 1 M                                                       |
| β-lactams (Cu)             | E    | 6   | Tris buffer pH 8.0                   | 1 M                                                       |
|                            |      | 1   | CuSO <sub>4</sub> ·5H <sub>2</sub> O | 1 M                                                       |
| Sodium nitroprusside       | F    | 2   | K <sub>2</sub> CO <sub>3</sub>       | 2 M                                                       |
|                            |      | 1   | Sodium nitroprusside                 | 200 mg/mL                                                 |
|                            |      | 3   | Sodium nitroprusside                 | 200 mg/mL                                                 |
| Naphtholquinone sulfonate  | G    | 4   | NaOH                                 | 2 M                                                       |
|                            |      | 1   | NaOH                                 | 6 M                                                       |
|                            |      | 3   | NQS                                  | 10 mg/mL                                                  |
|                            |      | 4   | NQS                                  | 10 mg/mL                                                  |
| Ethambutol (Cu)            | H    | 1   | NaOH                                 | 2 M                                                       |
|                            |      | 3   | CuSO <sub>4</sub> ·5H <sub>2</sub> O | 1 M                                                       |
| Aspirin test               | I    | 1   | FeCl <sub>3</sub>                    | 125 mg/mL in water                                        |
|                            |      | 3   | NaOH                                 | 6M                                                        |
| Starch                     | J    | 3   | Triiodide/povidone                   | 0.5% I <sub>2</sub> , excess I <sup>-</sup> , 2% povidone |
|                            |      | 3   | NaOH                                 | 2 M                                                       |
| <i>p</i> -Nitroaniline     | K    | 4   | NaNO <sub>2</sub>                    | 30 mg/mL                                                  |
|                            |      | 5   | <i>p</i> -Nitroaniline               | 30 mg/mL in acetonitrile                                  |
|                            |      | 6   | Tosic acid                           | 1 M                                                       |
|                            |      | 3   | FeCl <sub>3</sub>                    | 125 mg/mL in water                                        |
| Carbonate                  | L    | 0   | Tosic acid                           | 1 M                                                       |
|                            |      | 1   | Tosic acid                           | 1 M                                                       |
|                            |      | 3   | Pyridyl pyridinium chloride          | 30 mg/mL                                                  |
|                            |      | 4   | NaOH                                 | 6 M                                                       |

PAD = paper analytical device; SNP = sodium nitroprusside; NQS = naphthoquinone sulfonate.  
See Figure 2A for locations of lanes and rows referred to in this table.

\*Biuret test reagent 10× recipe: 1.5 g CuSO<sub>4</sub>·5H<sub>2</sub>O, 6 g Rochelle salt, 20 mL 2 M NaOH.

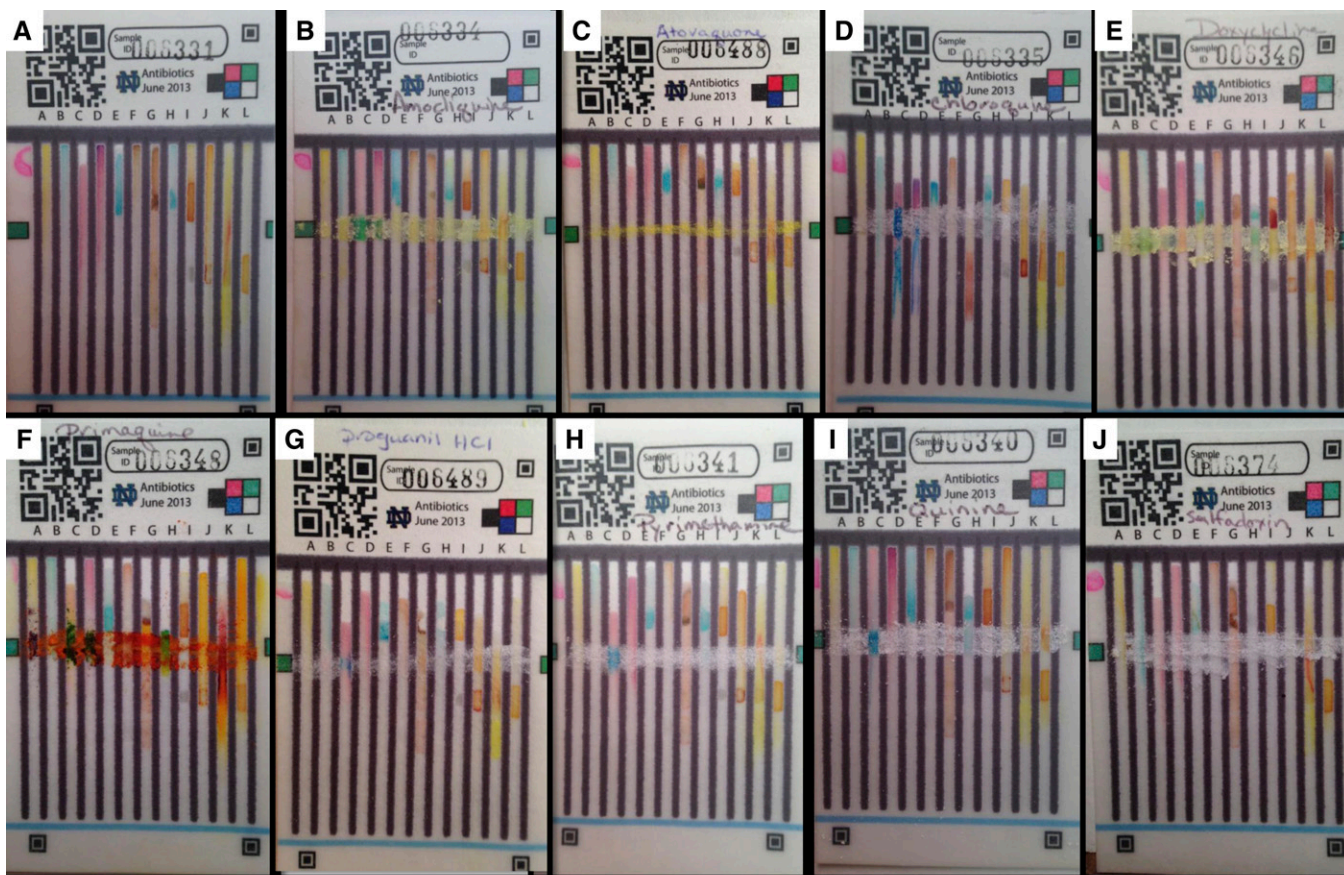

SUPPLEMENTAL FIGURE 1. Images of 12-lane paper analytical devices (PADs) run with different analytes. Analytes include water (A), amodiaquine (B), atovaquone (C), chloroquine (D), doxycycline (E), primaquine (F), proguanil (G), pyrimethamine (H), quinine (I), and sulfadoxine (J).

SUPPLEMENTAL TABLE 2  
Lane by lane test outcomes for antimalarial active ingredients

| Sample                      | Sample color                 | Timer (edge)                                     | Ninhydrin (Lane A)      | Biuret (Lane B)         | Cobalt thiocyanate acidic (Lane C) | Cobalt thiocyanate pH 8.0 (Lane D)            | β-lactams (Lane E)                       |
|-----------------------------|------------------------------|--------------------------------------------------|-------------------------|-------------------------|------------------------------------|-----------------------------------------------|------------------------------------------|
| Water                       | None                         | Pink spot                                        | Yellow                  | Light blue              | Pink                               | Pink                                          | Blue (does not always reach top of lane) |
| Amodiaquine                 | Pale yellow                  | Like water                                       | Like water              | Like water              | Emerald green at swipe             | Emerald green at swipe, (fainter than Lane C) | Like water                               |
| Artesunate                  | White                        | Like water                                       | Like water              | Like water              | Like water                         | Faint blue at test edges on swipe             | Like water                               |
| Atovaquone                  | Bright yellow                | Like water                                       | Like water              | Like water              | Like water                         | Like water                                    | Like water                               |
| Chloroquine                 | White                        | Like water                                       | Like water              | Like water              | Blue at swipe                      | Blue at swipe (fainter than Lane C)           | Like water                               |
| Doxycycline                 | Pale yellow                  | Like water                                       | Like water              | Green at swipe          | Pale green at swipe                | Faint orange at swipe                         | Green just above swipe                   |
| Primaquine                  | Bright orange                | Yellow background pink spot                      | Black at swipe          | Like water              | Dark green at swipe                | Dark green at swipe                           | Like water                               |
| Pyrimethamine               | White                        | Like water                                       | Like water              | Like water              | Blue at swipe                      | Like water                                    | Like water                               |
| Proguanil                   | White                        | Like water                                       | Like water              | Like water              | Blue at swipe                      | Like water                                    | Like water                               |
| Quinine and quinine sulfate | White                        | Like water                                       | Like water              | Like water              | Blue at swipe                      | Like water                                    | Like water                               |
| Sulfadoxine                 | White                        | Like water                                       | Like water              | Like water              | Like water                         | Like water                                    | Green streak at top of blue              |
|                             | SNP (Lane F)                 | NQS (Lane G)                                     | Ethambutol (Lane H)     | Aspirin test (Lane I)   | Starch test (Lane J)               | p-Nitroaniline (Lane K)                       | Iron(III) chloride (Lane L)              |
| Water                       | Brown to top of lane         | Dark brown spot above swipe, light brown above   | Blue                    | Orange                  | Yellow/orange                      | Traces of orange/yellow near and below swipe  | White at swipe and above                 |
| Amodiaquine                 | Like water                   | Like water                                       | Traces of green in blue | Like water              | Like water                         | Yellow at swipe, faint yellow above swipe     | Like water                               |
| Artesunate                  | Like water                   | Like water                                       | Like water              | Like water              | Like water                         | Like water                                    | Like water                               |
| Atovaquone                  | Like water                   | Like water                                       | Like water              | Like water              | Like water                         | Orange at swipe line                          | Like water (compound is yellow)          |
| Chloroquine                 | Like water, reduced mobility | Reduced mobility, little to no color above swipe | Like water              | Like water              | Like water                         | Like water                                    | Like water                               |
| Doxycycline                 | Like water                   | Like water                                       | Green at swipe          | Deep orange above swipe | Like water                         | Orange at swipe line                          | Brown                                    |
| Primaquine                  | Like water                   | Yellow at swipe, above is like water             | Green at or above swipe | Like water              | Like water                         | Red at swipe                                  | Yellow                                   |
| Pyrimethamine               | Like water                   | Like water                                       | Like water              | Like water              | Like water                         | Like water                                    | Faint yellow a swipe                     |
| Proguanil                   | Like water                   | Like water                                       | Like water              | Like water              | Like water                         | Like water                                    | Like water                               |
| Quinine and quinine sulfate | Like water                   | Like water                                       | Like water              | Like water              | Like water                         | Like water                                    | Yellow at swipe                          |
| Sulfadoxine                 | Like water                   | Like water                                       | Like water              | Like water              | Like water                         | Like water                                    | Like water                               |

SNP = sodium nitroprusside; NQS = naphthoquinone sulfonate.

SUPPLEMENTAL TABLE 3

Samples used and subsequent 12-lane test card sensitivity and specificity based on blinded reader evaluations. Sample numbers are shown in parentheses following sensitivity and specificity

|                               | Positive test samples                                 | Negative test samples                             | Sensitivity  | Specificity  | Reader disagreements |
|-------------------------------|-------------------------------------------------------|---------------------------------------------------|--------------|--------------|----------------------|
| Presence of active ingredient | 100%, 70%, 40% CQ                                     | 100% calcium carbonate, 100% acetylsalicylic acid | 100% (60/60) | 100% (20/20) | 0                    |
|                               | 100%, 70% CQ                                          | 40% or less CQ                                    | 100% (40/40) | 50% (20/40)  | 0                    |
|                               | 100% pyrimethamine                                    | 100% calcium carbonate, 100% acetylsalicylic acid | 95% (19/20)  | 100% (20/20) | 1                    |
|                               | Sulfadoxine pyrimethamine mixture (for pyrimethamine) | 100% calcium carbonate, 100% acetylsalicylic acid | 40% (8/20)   | 100% (20/20) | 1                    |
|                               | 100%, 40% DOX                                         | 100% calcium carbonate, 100% acetylsalicylic acid | 100 (40/40)  | 100% (20/20) | 0                    |
|                               | 100% CQ                                               | 70% CQ with calcium carbonate                     | 100% (20/20) | 0% (0/20)    | 5                    |
|                               | 100% DOX                                              | 40% DOX with starch                               | 95% (19/20)  | 100% (10/10) | 1                    |
|                               | 100% DOX                                              | 40% DOX with PVP                                  | 95% (19/20)  | 10% (1/10)   | 3                    |
| Presence of excipients        | 100% acetylsalicylic acid                             | 100%, 70%, and 40%, CQ, 100% calcium carbonate    | 90% (9/10)   | 100% (70/70) | 22                   |
|                               | 100% calcium carbonate                                | 100%, 40% CQ, 100% acetyl salicylic acid          | 100% (10/10) | 100% (50/50) | 1                    |
|                               | 40% CQ with starch                                    | CQ without starch (100%, 70%)                     | 100% (20/20) | 100% (40/40) | 1                    |

CQ = chloroquine; DOX = doxycycline; PVP = polyvinylpyrrolidone.

SUPPLEMENTAL TABLE 4

Sulfadoxine test lane sensitivity and specificity based on blinded reader evaluations

|                               | Positive test samples | Negative test samples | Sensitivity | Specificity | Reader disagreements |
|-------------------------------|-----------------------|-----------------------|-------------|-------------|----------------------|
| Presence of active ingredient | 100% sulfadoxine      | No API (corn starch)  | 100% (24)   | 100% (24)   | 0                    |
|                               | 100%, 70% sulfadoxine | No API (corn starch)  | 98% (48)    | 100% (24)   | 0                    |
|                               | 70% sulfadoxine       | No API (corn starch)  | 96% (24)    | 100% (24)   | 0                    |
|                               | 40% sulfadoxine       | No API (corn starch)  | 100% (24)   | 100% (24)   | 0                    |
|                               | 10% sulfadoxine       | No API (corn starch)  | 92% (24)    | 100% (24)   | 0                    |

API = active pharmaceutical ingredient.
